# Supplementary material for: Knowledge of Cervical Cancer and Acceptability of Prevention Strategies Among Human Papillomavirus-Vaccinated and Human Papillomavirus-Unvaccinated Adolescent Women in Eldoret, Kenya
Source: PubMed Central journal article supplement (PMC6715544; doi:10.1089/biores.2019.0007), 2019-08-20

## Supplementary Data

**Supplementary Table S1. Statements Used to Assess Knowledge**

- 
- 1 Have you ever heard of cervical cancer?
  - 2 Have you ever heard of the HPV vaccine?
  - 3 How is HPV transmitted?
  - 4 Do you think having sex at an early age is a risk factor for cervical cancer?
  - 5 Do you think smoking is a risk factor for cervical cancer?
  - 6 Do you think having many sexual partners is a risk factor for cervical cancer?
  - 7 Do you think having a male partner who has many sexual partners is a risk for cervical cancer?
  - 8 A person suffering from early cervical cancer will have the following signs and symptoms  
(tick ✓ for Yes and cross X for No)  
Rare
  - 9 A person suffering from late cervical cancer will have the following signs and symptoms  
(tick ✓ for Yes and cross X for No)  
Lower abdominal pain  
Vaginal bleeding  
Vaginal discharge  
Anemia  
Postcoital bleeding  
Involuntary loss of urine and/or feces through the vagina  
Weakness  
Weight loss
  - 10 What are the treatment modalities available for cervical cancer?  
(tick ✓ for Yes and cross X for No)  
Antibiotics  
Chemotherapy  
Radiation  
Surgery  
I do not know
  - 11 What are the screening modalities used to detect early cervical cancer?  
Blood tests  
Pap smear  
VIA/VILLI  
I don't know
  - 12 Can cervical cancer be prevented?
  - 13 Do you think you are at risk of getting HPV infection?
  - 14 What do you think is the best age to be to start having sex?  
10–20  
20–30  
Above 30 years
  - 15 How often do you think someone use male condom during intercourse?  
Sometimes Always Never
- 

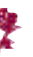

Supplement: Supp_Table1.pdf [file Supp_Table1.pdf]
